# Supplementary material for: A novel NIR fluorescent probe with ratiometric imaging of cysteine in endoplasmic reticulum
Source: Royal Society of Chemistry journal article supplement (doi:10.1039/d2nj04902c), 2022-01-01
Supplement: d2nj04902c1.pdf [file d2nj04902c1.pdf]

## Supporting information

### **A novel NIR fluorescent probe with ratiometric imaging of cysteine in Endoplasmic Reticulum**

Ziming Wang,<sup>a</sup> Shenwei He,<sup>a</sup> Xiujuan Xu,<sup>a</sup> Peiyao Xie,<sup>a</sup> Hanlei Yan,<sup>a</sup> Di Zhang,<sup>\*b</sup> Yong Ye<sup>\*a</sup> and  
Yufen Zhao<sup>a, c</sup>

<sup>a</sup> Green Catalysis Center, and College of Chemistry, Zhengzhou University, Zhengzhou 450001, China

<sup>b</sup> Institute of Agricultural Quality Standards and Testing Technology, Henan Academy of Agricultural Sciences, Zhengzhou 450002, China

<sup>c</sup> Institute Drug Discovery Technology, Ningbo University, Ningbo 315211, Zhejiang, China

\*Corresponding author; Email: yeyong03@tsinghua.org.cn (Yong Ye), [pandy811@163.com](mailto:pandy811@163.com) (Di Zhang)

### **Contents**

|                                     |    |
|-------------------------------------|----|
| Experimental part.....              | S2 |
| 1. Apparatus.....                   | S2 |
| 2. Materials .....                  | S2 |
| 3. Cell culture.....                | S3 |
| 4. Synthesis .....                  | S3 |
| 5. References and Scheme S1 .....   | S5 |
| Table S1S6                          |    |
| Characterization of compounds ..... | S8 |
| Figure S13-S18S14-S17               |    |

## Experimental part

### 1. Apparatus

Absorption spectra were accurately measured on a HP-8453 UV/Vis (Agilent) spectrometer. Fluorescence spectra were measured on the F-4500 Spectrophotometer and the EX Slit and EM Slit were both set at 10.0 nm. The pH was measured by a Model PHs-3C meter (Shanghai, China).  $^1\text{H}$  NMR and  $^{13}\text{C}$  NMR spectra were measured on a Bruker DTX-400 spectrometer using TMS as internal reference. HR-MS (high-resolution mass spectrometry) spectra were collected using the Q-T of HR-MS spectrometer (Waters Micromass). Cells were imaged using LEICA TCS SP8 laser scanning confocal microscope.

### 2. Materials

All the reagents were purchased from reagent companies without further purification and directly used in the experiment. The deionized water was purified by Milli-Q. The probe was put into 10 mL DMSO to get a 1mM stock solution. Then it was diluted to 10  $\mu\text{M}$  in 10 mM HEPES solution with 1 mM CTAB for spectroscopic determination. The interfering ions include:  $\text{Na}^+$ ,  $\text{K}^+$ ,  $\text{Fe}^{2+}$ ,  $\text{F}^-$ ,  $\text{Br}^-$ ,  $\text{I}^-$ ,  $\text{CH}_3\text{COO}^-$ ,  $\text{CO}_3^{2-}$ ,  $\text{HCO}_3^-$ ,  $\text{HPO}_4^{2-}$ ,  $\text{H}_2\text{PO}_4^-$ ,  $\text{SO}_4^{2-}$ ,  $\text{NO}_3^-$ ,  $\text{NO}_2^-$ ,  $\text{HS}^-$ ,  $\text{SO}_3^{2-}$ ,  $\text{HSO}_3^-$ , GSH, Hcy, Cys, NO, HNO,  $^1\text{O}_2$ ,  $\text{H}_2\text{O}_2$ , HClO,  $\cdot\text{OH}$ ,  $\text{ONOO}^-$ .

### 3. Cell culture

HeLa cells were inoculated in 96-well plates, cultured in 5%  $\text{CO}_2$ , 37°C for 24 h, removed the old medium, washed with PBS for 3 times. Then, the prepared medium containing different concentrations of probe **HL-Cys** (0, 5  $\mu\text{M}$ , 10  $\mu\text{M}$ , 15  $\mu\text{M}$  and 20  $\mu\text{M}$ ) was added and placed in an incubator for further culture for 24 h. Cell Counting Kit (CCK-8) staining was used to evaluate the cytotoxicity of probe **HL-Cys**. Cell survival rate = experimental group/control group  $\times$  100%.

### 4. Synthesis

Compound **1** and Compound **4** was synthesized according to the previous literatures<sup>[a,b]</sup>

Synthesis of Compound **2**: Compound **1** (242 mg, 1.3 mmol), 5-Formylsalicylic Acid (166 mg, 1 mmol) and piperidine (0.1 mL) were dissolved in 7 mL EtOH under argon atmosphere, the mixture was refluxed 10 h. At the end of the reaction, the solvent was removed under reduced pressure and the residue was purified by column chromatography with dichloromethane: methanol (30:1) as the eluent to afford the desired product as a red solid (230 mg, yield 69%). <sup>1</sup>H NMR (400 MHz, DMSO-*d*<sub>6</sub>) δ (ppm): 8.06 (d, *J* = 2.12 Hz, 1H), 7.73 (dd, *J* = 8.6, 2.16 Hz, 1H), 7.24 (q, *J* = 16.08 Hz, 2H), 6.83 (t, *J* = 4.64 Hz, 2H), 2.59 (s, 2H), 2.53 (s, 2H), 1.01 (s, 6H). <sup>13</sup>C NMR (100 MHz, DMSO-*d*<sub>6</sub>) δ (ppm): 171.9, 170.7, 164.8, 157.2, 138.7, 133.3, 131.4, 126.7, 126.0, 121.8, 118.1, 117.6, 114.6, 113.8, 75.2, 42.8, 38.6, 32.1, 27.9. HR-MS: *m/z* calcd for C<sub>20</sub>H<sub>18</sub>N<sub>2</sub>O<sub>3</sub>[M - H]<sup>-</sup>: = 333.1244, found: 333.1250.

Synthesis of Compound **3**: Compound **2** (100 mg, 0.3 mmol) and N-hydroxysuccinimide (41.4 mg, 0.36 mmol) were dissolved in THF (4 mL) was added DCC (74.2 mg, 0.36 mmol). The mixture was stirred at room temperature for 30 min. At the end of the reaction, the solvent was removed under reduced pressure and the residue was purified by column chromatography with Petroleum ether: dichloromethane (1:1) as the eluent to afford the desired product as a yellow solid (40 mg, yield 31%). <sup>1</sup>H NMR (400 MHz, DMSO-*d*<sub>6</sub>) δ (ppm): 12.21 (s, 1H), 8.12 (d, *J* = 1.88 Hz, 1H), 8.00 (dd, *J* = 1.88, 1.92 Hz, 1H), 7.38 - 7.29 (m, 2H), 7.11 (d, *J* = 8.72 Hz, 1H), 6.87 (s, 1H), 2.90 (s, 4H), 2.61 (s, 2H), 2.54 (s, 2H), 1.01 (s, 6H). <sup>13</sup>C NMR (100 MHz, DMSO-*d*<sub>6</sub>) δ (ppm): 170.9, 170.8, 161.1, 161.0, 156.5, 136.8, 135.0, 132.4, 128.6, 128.0, 122.8, 119.0, 114.4, 113.6, 112.0, 76.4, 42.7, 38.6, 32.1, 27.9, 26.0. HR-MS: *m/z* calcd for C<sub>24</sub>H<sub>21</sub>N<sub>3</sub>O<sub>5</sub>[M - H]<sup>-</sup>: = 430.1408, found: 430.1413.

Synthesis of Compound **5**: Compound **3** (86.2 mg, 0.2 mmol) and Compound **4** (55.6 mg, 0.3 mmol) were dissolved in DCM (6 mL) was added triethylamine (0.06 mL). The mixture was stirred at room temperature for 2 h. At the end of the reaction, the solvent was removed under reduced pressure and the residue was purified by column chromatography with dichloromethane: methanol (100 :1) as the eluent to afford the desired product as an orange solid (91 mg, yield 86%). <sup>1</sup>H NMR (400 MHz, DMSO-*d*<sub>6</sub>) δ (ppm): 12.77 (s, 1H), 8.87 (t, *J* = 5.56 Hz, 1H), 8.15 (d, *J* = 1.88 Hz, 1H), 7.76 - 7.72 (m, 2H), 7.69 (s, 1H), 7.67 (s, 1H), 7.36 (s, 1H), 7.34 (s, 1H), 7.23 (s, 2H),

6.95 (d,  $J=8.60$  Hz, 1H), 6.81 (s, 1H), 3.37 (q,  $J=6.28$  Hz, 2H), 2.94 (q,  $J=6.28$  Hz, 2H), 2.62 (s, 2H), 2.54 (s, 2H), 2.34 (s, 3H), 1.02 (s, 6H).  $^{13}\text{C}$ NMR (100 MHz, DMSO- $d_6$ )  $\delta$  (ppm): 170.6, 169.1, 161.7, 156.4, 143.1, 137.9, 137.6, 134.0, 130.7, 127.9, 127.8, 127.3, 127.0, 122.4, 118.5, 116.1, 114.4, 76.2, 42.7, 42.0, 38.6, 32.1, 27.9, 21.4. HR-MS:  $m/z$  calcd for  $\text{C}_{29}\text{H}_{30}\text{N}_4\text{O}_4\text{S}[\text{M}-\text{H}]^- = 529.1915$ , found: 529.1919.

## 5. References

- Ma Y, Gao W and Ma S, *Anal. Chem.*, 2020, **92**, 13405-13410.
- Song W, Dong B and Lu Y, *New J. Chem.*, 2019, **43**, 12103-12108.

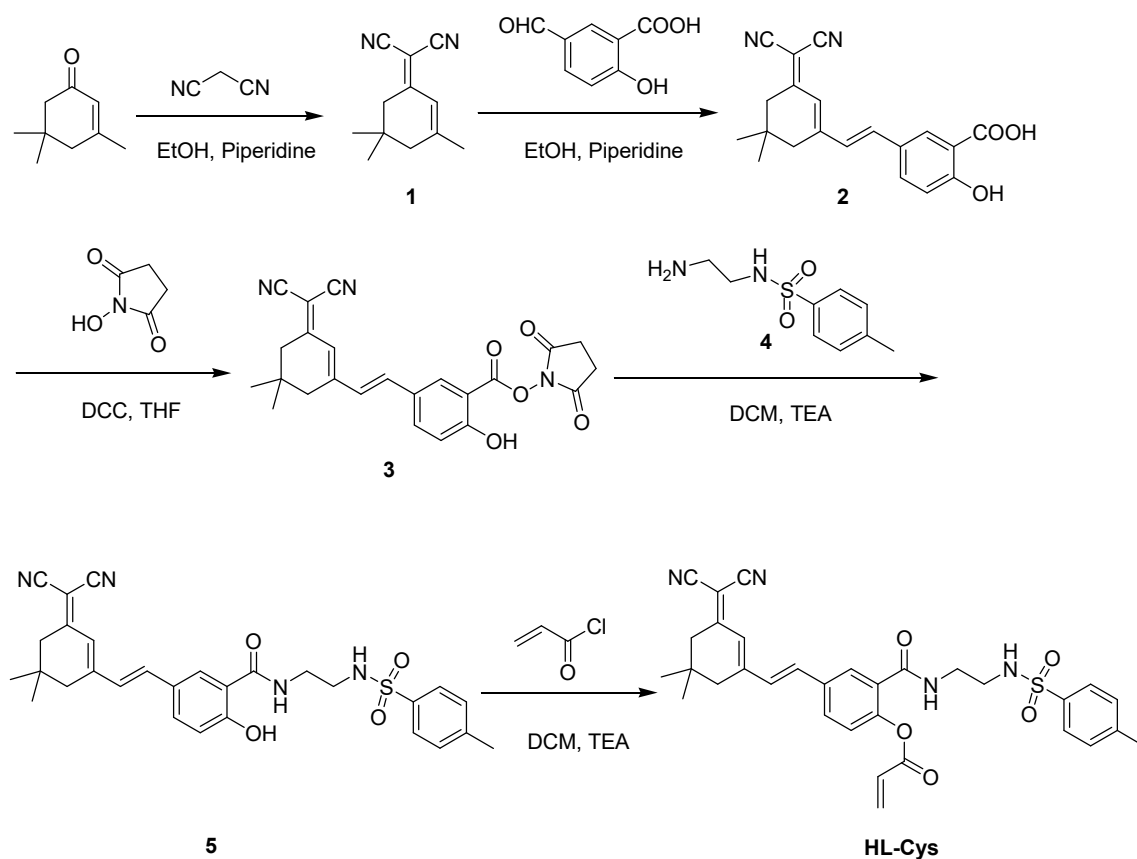

**Scheme S1.** Synthetic route of HL-Cys

**Table S1 Comparison of reported probes for recognition of Cys**

| Structure                                                                           | $\lambda_{ex}/\lambda_{em}$<br>(nm) | Stock's<br>Shifts(<br>nm) | Detectio<br>n<br>Limit | Respo<br>nse<br>time | Targeti<br>ng | Rational                           | References                                                  |
|-------------------------------------------------------------------------------------|-------------------------------------|---------------------------|------------------------|----------------------|---------------|------------------------------------|-------------------------------------------------------------|
| 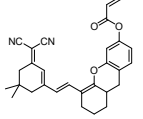   | 590/770                             | 180                       | 0.4 $\mu$ M            | 10min                | -             | -                                  | Anal<br>Chimica<br>Acta<br><br>2021,<br>1171, 33865<br>5    |
|    | 445/500                             | 55                        | 0.122 $\mu$ M          | 200s                 | -             | -                                  | Sens.<br>Actuators<br>B: Chem.<br>2018, 267,<br>76-82       |
|   | 540/714                             | 174                       | 28.6 nM                | 5min                 | -             | -                                  | Sens.<br>Actuators<br>B: Chem.<br>2022, 357,<br>131430      |
|  | 700/770                             | 70                        | 16 nM                  | 10min                | Lyso-         | -                                  | J. Mater.<br>Chem. B,<br>2020, 8,<br>2269                   |
|  | 560/640                             | 80                        | 0.2 $\mu$ M            | 5min                 | Mito-         | F <sub>640</sub> /F <sub>785</sub> | Biosensors<br>and<br>Bioelectroni<br>cs 2015, 74<br>156-164 |
|  | 535/635                             | 100                       | 0.09 $\mu$ M           | 30min                | Mito-         | F <sub>635</sub> /F <sub>794</sub> | Sens.<br>Actuators<br>B: Chem.<br>2019, 282,<br>69-77       |
|  | 600/760                             | 160                       | 48 nM                  | 5min                 | -             | -                                  | Anal.<br>Chem. 2018<br>, 90, 1014–<br>1020                  |

|                                                                                     |                |            |               |             |           |                                        |                                             |
|-------------------------------------------------------------------------------------|----------------|------------|---------------|-------------|-----------|----------------------------------------|---------------------------------------------|
| 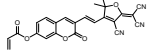   | 481/675        | 194        | 0.2 $\mu$ M   | 5min        | -         | F <sub>675</sub> /F <sub>530</sub>     | Dyes. Pigments, 2017, 146 103-111           |
|    | 610/716        | 116        | 0.083 $\mu$ M | -           | Mito-     | F <sub>716</sub> /F <sub>660</sub>     | Sens. Actuators B: Chem. 2018, 259, 219-225 |
|    | 441/514        | 73         | 8.95 nM       | 30min       | ER        | -                                      | Chem Commun 2019, 55, 9629.                 |
|    | 390/550        | 160        | 1.8 $\mu$ M   | 20min       | ER        | F <sub>550</sub> /F <sub>440</sub>     | Anal. Chem. 2019 , 91, 5513–5516            |
|  | <b>410/650</b> | <b>240</b> | <b>490 nM</b> | <b>6min</b> | <b>ER</b> | <b>F<sub>650</sub>/F<sub>545</sub></b> | <b>This work</b>                            |

## Characterization of compounds

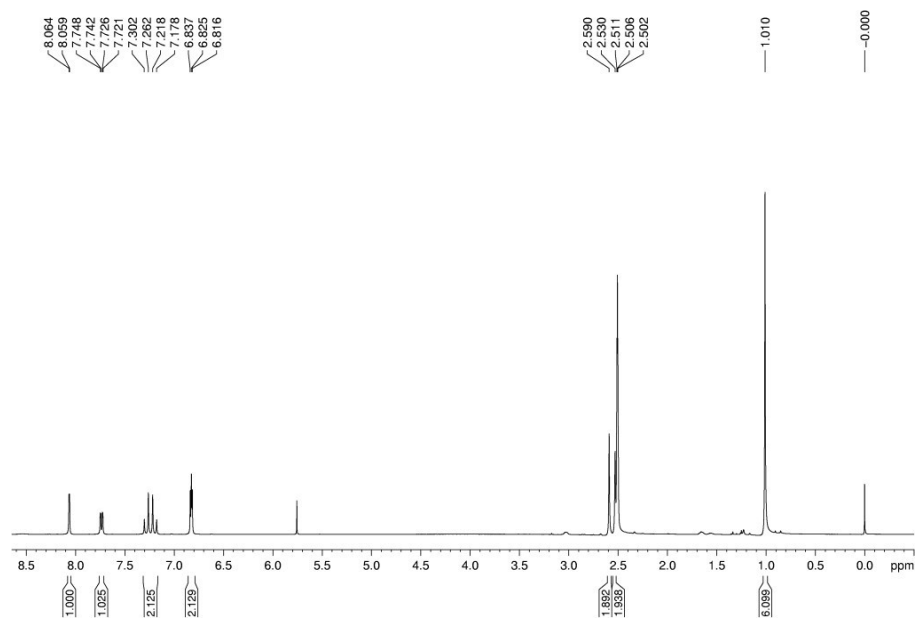

**Figure S1.**  $^1\text{H}$  NMR spectra of **2** in  $\text{DMSO-}d_6$ .

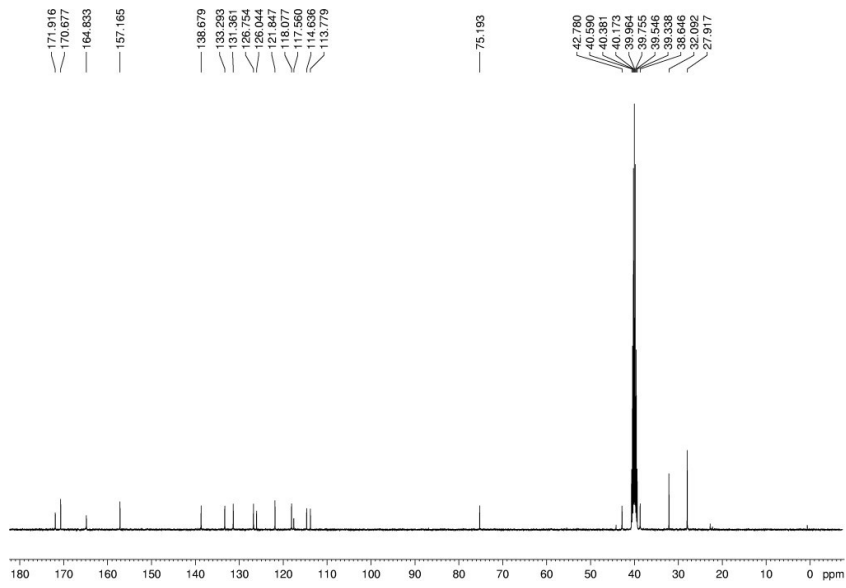

**Figure S2.**  $^{13}\text{C}$  NMR spectra of **2** in  $\text{DMSO-}d_6$ .

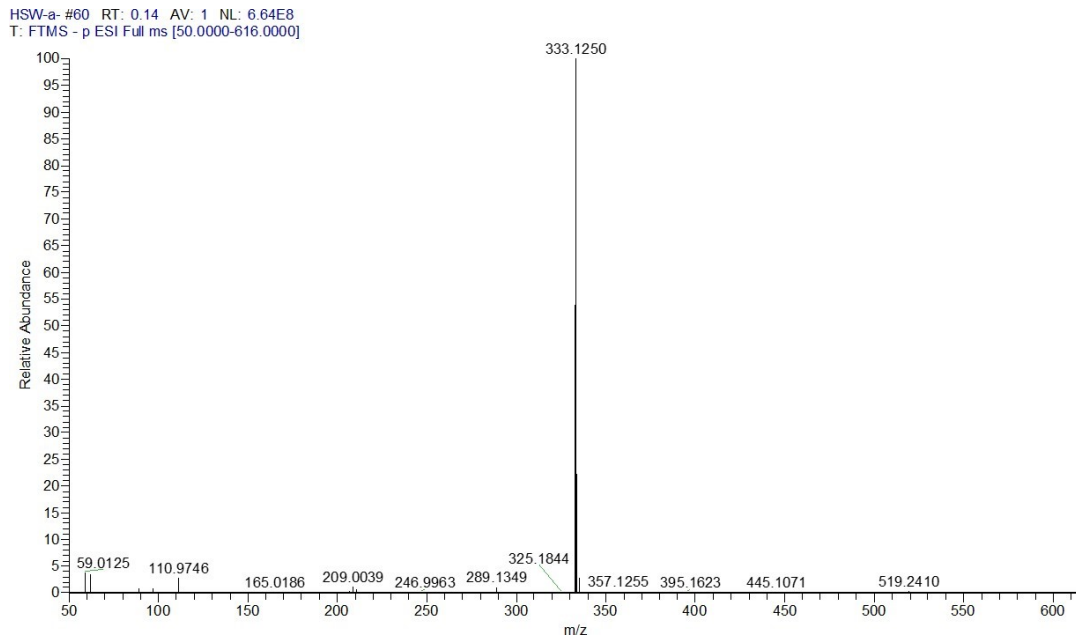

**Figure S3.** ESI-HRMS spectra of **2**.



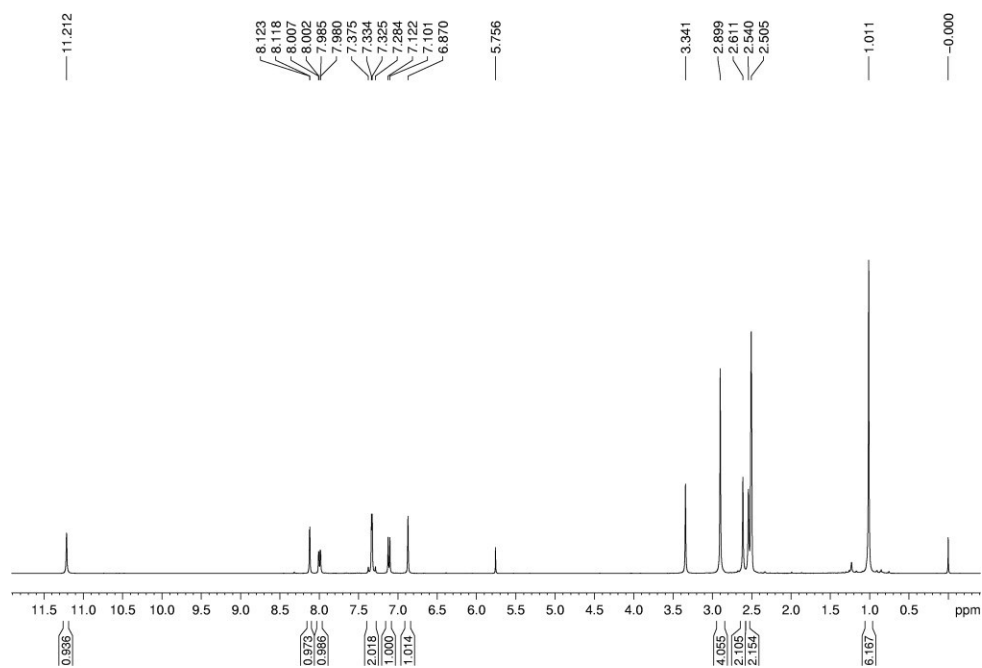

**Figure S4.**  $^1\text{H}$  NMR spectra of **3** in  $\text{DMSO-}d_6$ .

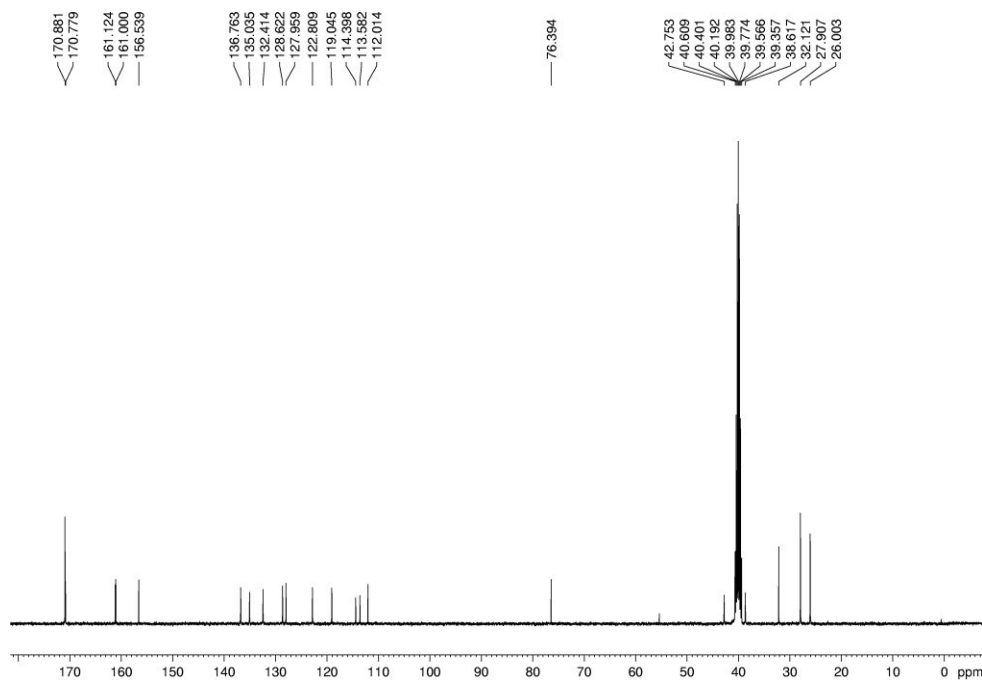

**Figure S5.**  $^{13}\text{C}$  NMR spectra of **3** in  $\text{DMSO-}d_6$ .

HSW-b- #155 RT: 0.36 AV: 1 NL: 1.43E7  
T: FTMS - p ESI Full ms [50.0000-616.0000]

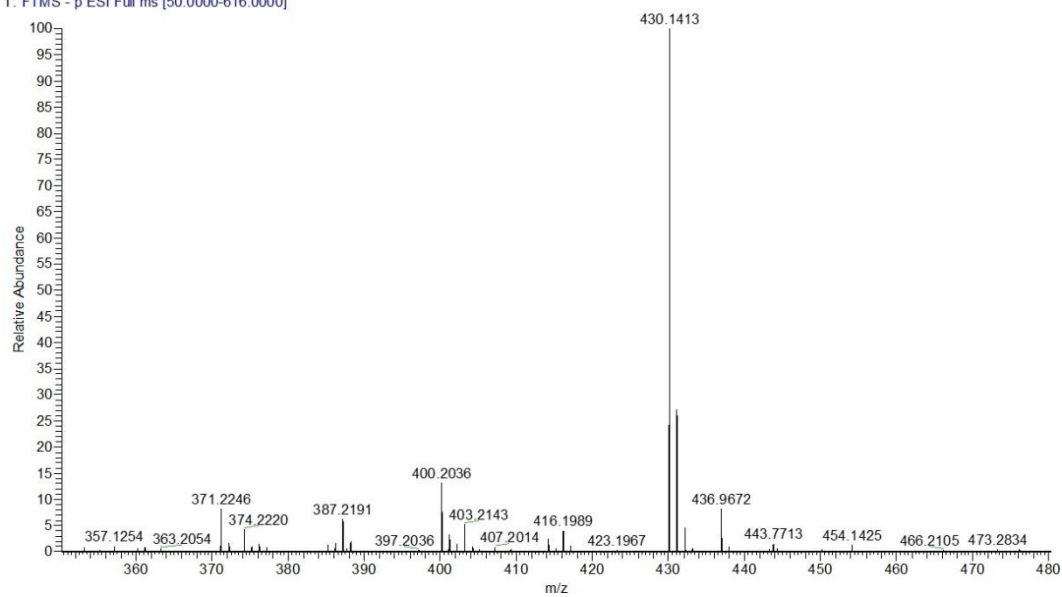

Figure S6. ESI-HRMS spectra of **3**.

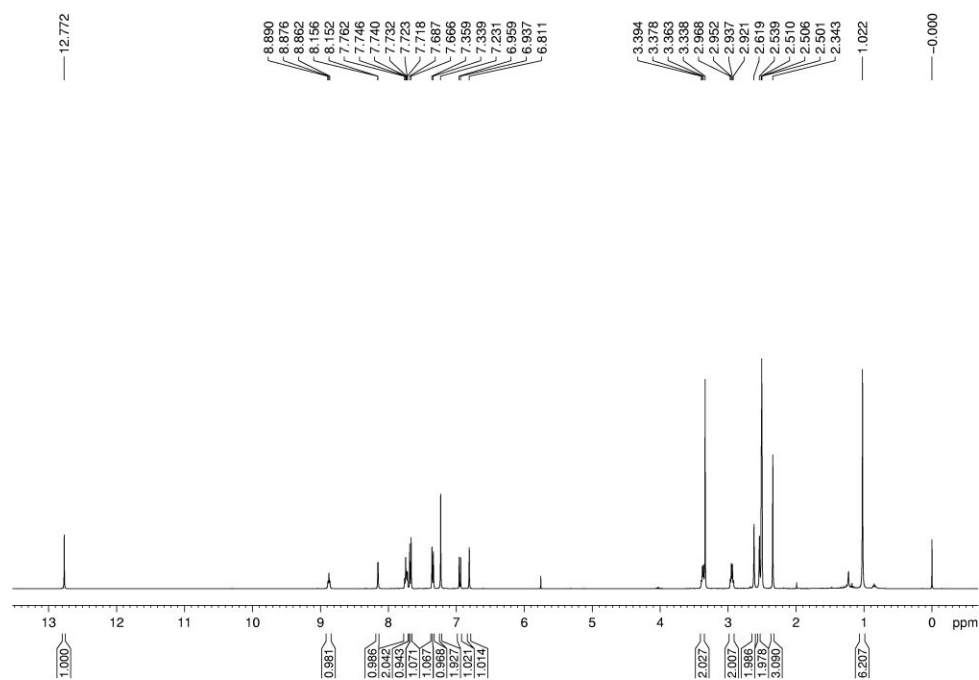

Figure S7. <sup>1</sup>H NMR spectra of **5** in DMSO-*d*<sub>6</sub>.

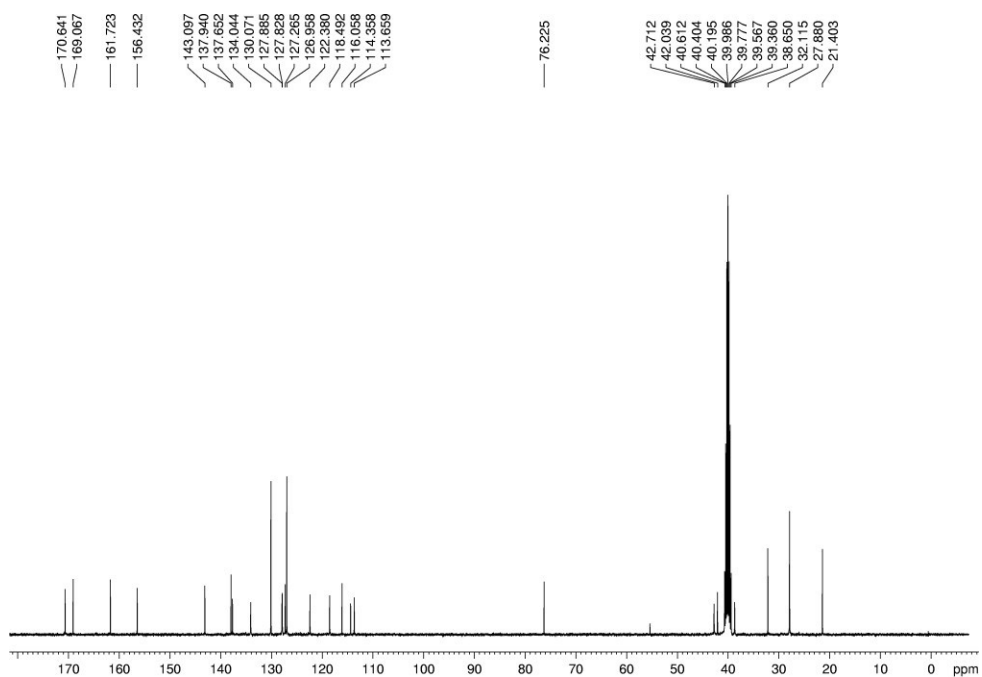

**Figure S8.**  $^{13}\text{C}$  NMR spectra of **5** in  $\text{DMSO-}d_6$ .

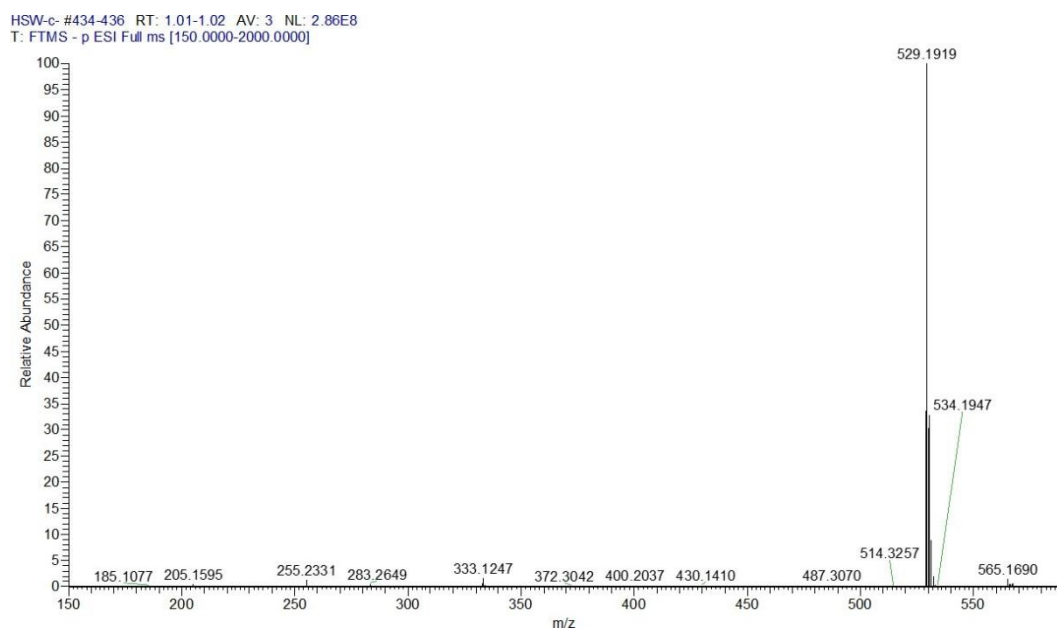

**Figure S9.** ESI-HRMS spectra of **5**.

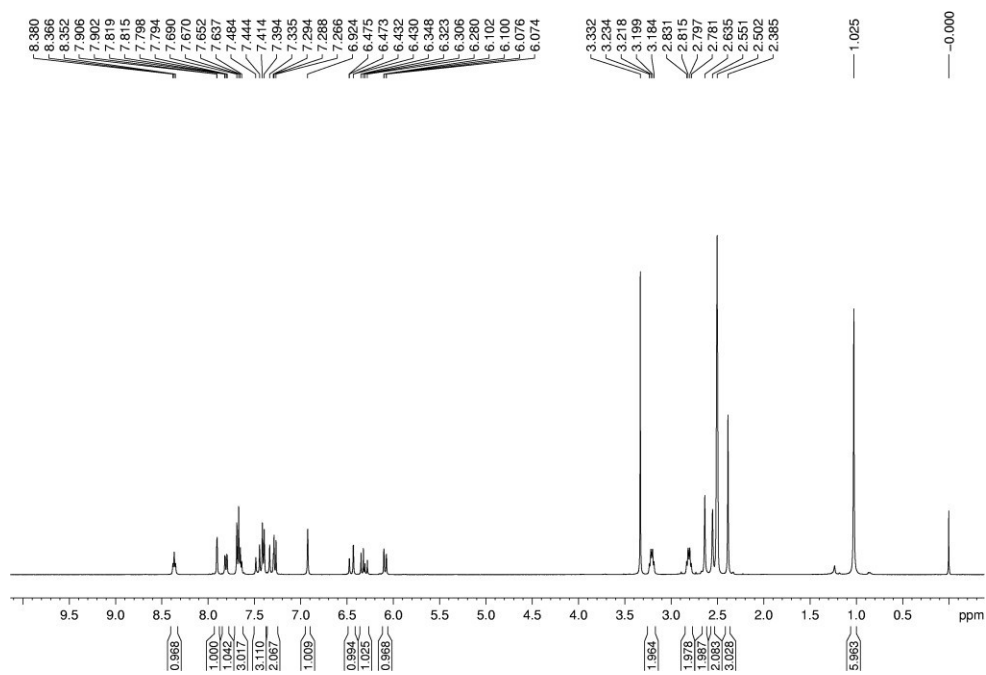

Figure S10.  $^1\text{H}$  NMR spectra of HL-Cys in  $\text{DMSO-}d_6$ .

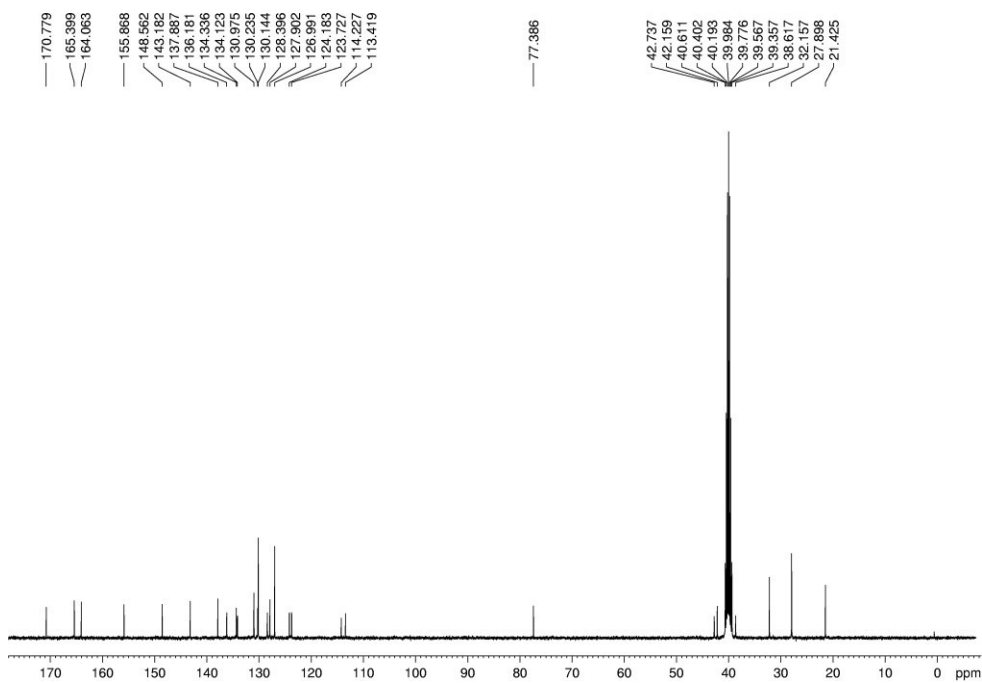

Figure S11.  $^{13}\text{C}$  NMR spectra of HL-Cys in  $\text{DMSO-}d_6$ .

HSW-d- #38 RT: 0.09 AV: 1 NL: 9.52E7  
T: FTMS - p ESI Full ms [150.0000-2000.0000]

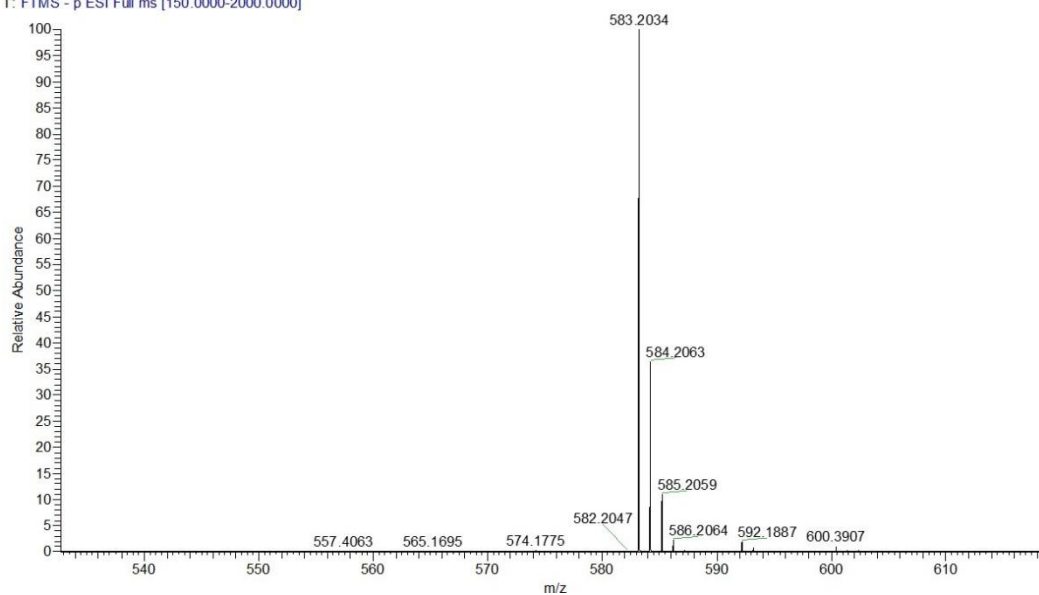

**Figure S12.** ESI-HRMS spectra of HL-Cys.

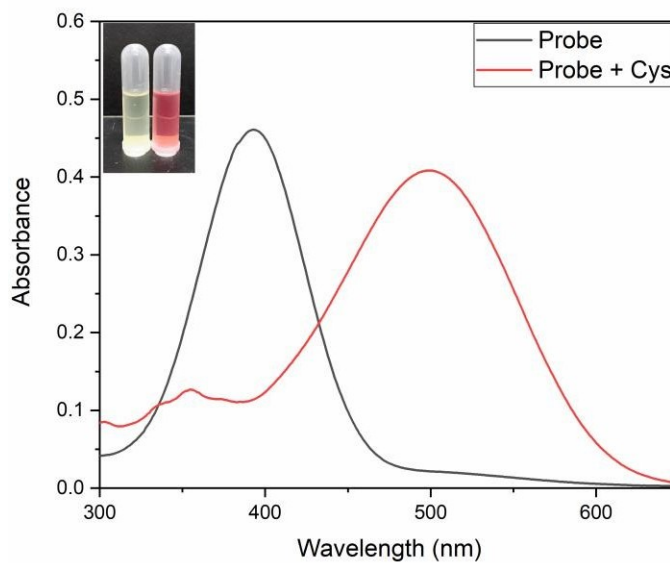

**Figure S13.** UV-vis absorption spectra of HL-Cys (10  $\mu$ M) before and after reaction with Cys (100  $\mu$ M) in PBS buffer solution (containing 30% DMSO, 10mM, pH=7.4). Inset: left, HL-Cys (10  $\mu$ M); right, HL-Cys (10  $\mu$ M) + Cys (100  $\mu$ M).

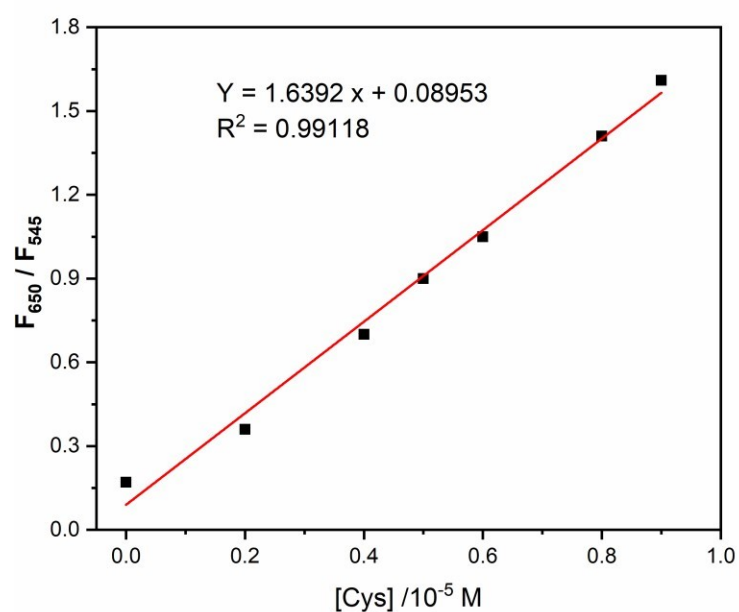

**Figure S14.** The linear fitting of fluorescence intensity ratio ( $F_{650}/F_{545}$ ) against concentrations of Cys (0-9  $\mu\text{M}$ ) in PBS buffer solution (containing 30% DMSO, 10mM, pH = 7.4).

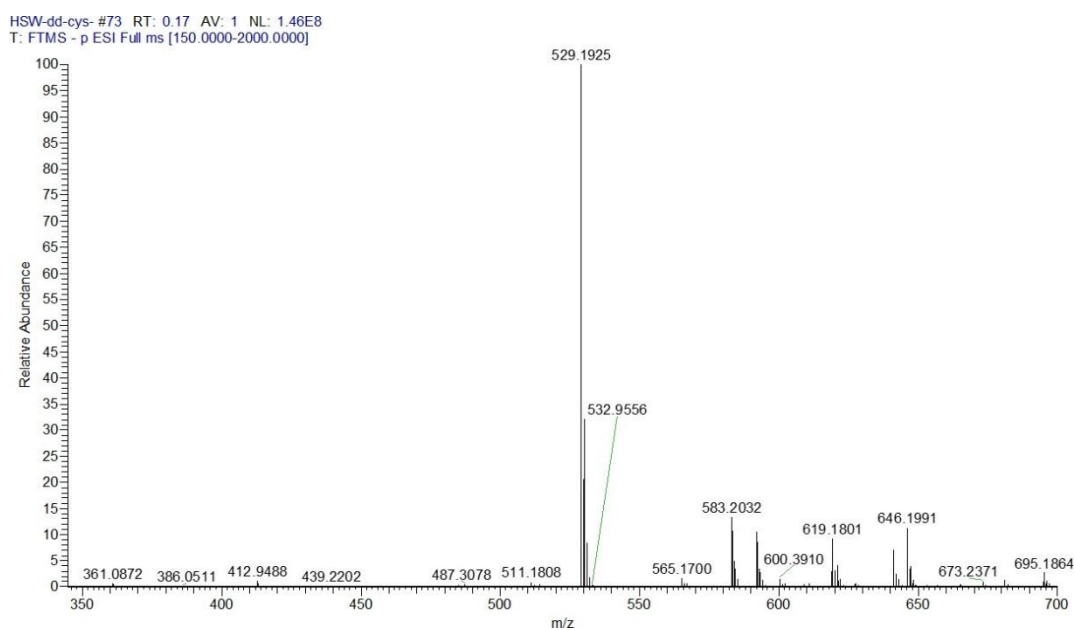

**Figure S15.** HR-MS spectra of HL-Cys in response to Cys.

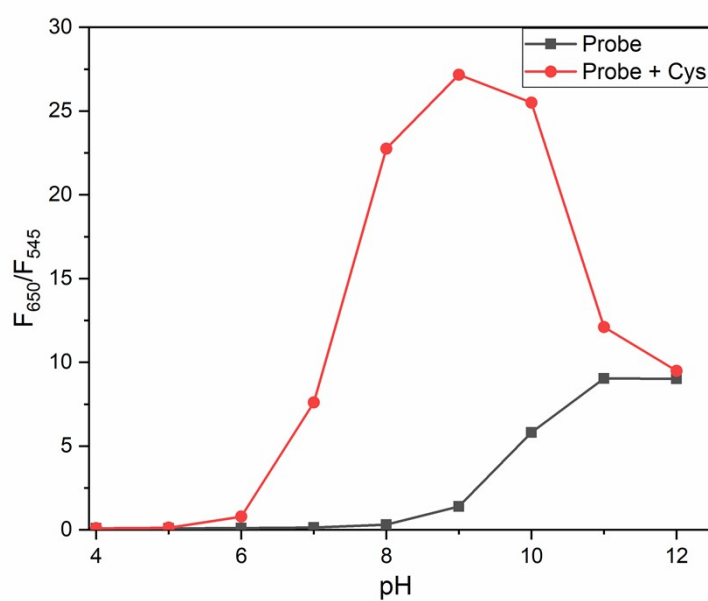

**Figure S16.** The fluorescence emission intensity of **HL-Cys** (10  $\mu\text{M}$ ) in solution of different pH value (4-12).

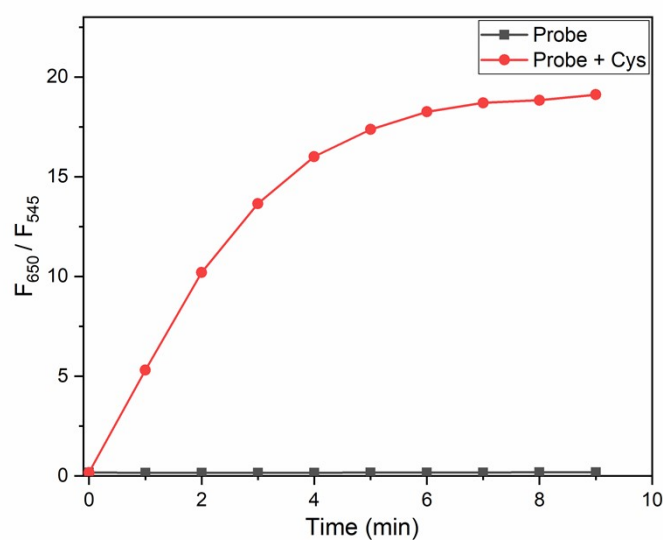

**Figure S17.** Time-dependent fluorescence intensity ratio ( $F_{650}/F_{545}$ ) of the **HL-Cys** (10  $\mu\text{M}$ ) without (black) and with (red) 100  $\mu\text{M}$  Cys in PBS buffer solution (containing 30% DMSO, 10 mM, pH = 7.4).

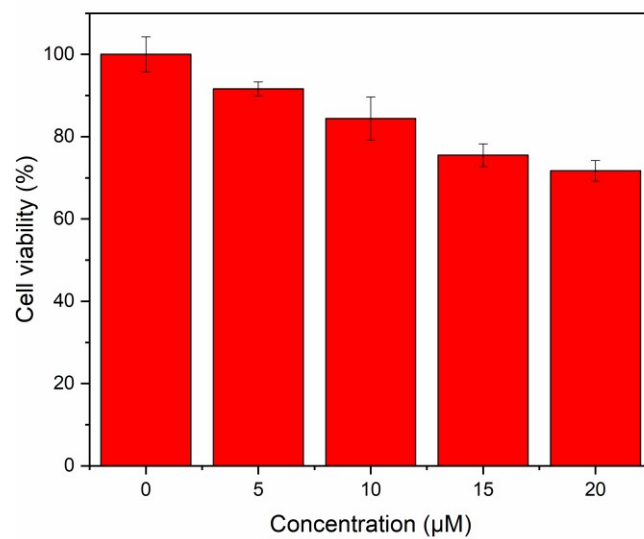

**Figure S18.** The cytotoxicity test of different concentrations **HL-Cys** in living HeLa cells for 24 h.
